# Supplementary material
Source: Research Square preprint supplement (doi:10.21203/rs.3.rs-10085889/v1)
Supplement: Supplementary file 1 [file 02706efe262e333114f43a90.docx]

**Table S9.** Detailed data on pneumatically actuated elastomeric grippers.

| **Study** | **Material & Fabrication** | **Max Pressure** | **Max Deformation / Bending** | **Max Payload / Force** | **Key Quantitative Outcome** |
| --- | --- | --- | --- | --- | --- |
| Hiremath et al. (2025) | TPU (MEX 3D-printed) | 5 bar (500 kPa) | 72 mm deflection | 13.26 g | Experimental > numerical deformation; holds 1.29–13.26 g |
| Buonamici et al. (2025) | TPU (FFF 3D-printed PneuNet) | 3 bar (300 kPa) | 68.7° (experimental) | 17.16 N (normal force) | 100% success on several produce items; silicone palm improves transversal force |
| El Bana et al. (2020) | Dragon Skin 20 (half-circular) | 35 kPa | 300 mm bending radius | 1 kg | Optimized FEA design |
| Arumathanthri et al. (2018) | Natural rubber (4-chamber) | 160–230 kPa | 25° | 215 g (max) | 215 g at 160 kPa |
| Liu et al. (2025) | Dragon Skin 10 silicone | Not specified (vision-controlled) | Measured vs. desired (e.g., 60.6° vs 90°) | Not quantified | >60% cost reduction; 100% fabrication yield |
| Bhat et al. (2025) | Liquid silicone rubber (LSR) | 90–100 kPa | Bending angle increases with pressure (FE + experimental) | Gripping force increases with pressure | Mimics human finger motion |
| Pedro et al. (2018) | Elastomer (closed-structure) | ~14 kPa (0.14 kgf/cm²) | Not specified | >1 kg | Softer elastomer supports broad weight range |
| Zhang et al. (2023) | TPU-coated nylon fabric | 50 kPa (tip force); 120 kPa burst | Full bending in ~600 ms | >7 kg (>150 N pull-off) | 400× dead-weight ratio; highest load-bearing |
