# Supplementary material
Source: Research Square preprint supplement (doi:10.21203/rs.3.rs-10085889/v1)
Supplement: Supplementary file 2 [file 038f2225c704a03aba2fdbfd.docx]

**Table S8.** Detailed findings from variable stiffness soft grippers.

| **Study** | **Category** | **Material** | **Max Pressure** | **Stiffness / Force Improvement** | **Max Payload / Force** |
| --- | --- | --- | --- | --- | --- |
| Mutlu et al. (2017) | Variable stiffness (bellows) | NinjaFlex | Not specified | +30% stiffness at 2 N | Higher load with stiffening |
| Zhao et al. (2023) | Modular particle-jamming | Silicone + Velcro | 90 kPa | Load capacity from 710 g → 1313 g | Significant increase |
| Al Abeach et al. (2017) | Antagonistic | Silicone | 400 kPa | +163% / +112% stiffness | 200 N (contractor) |
| Jiang et al. (2017) | Passive particle jamming | Silicone + particles | 50–80 kPa | >6× rotational stiffness | 1673 g (3× increase) |
| Zhuo et al. (2020) | Pneumatic-thermal hybrid | Ecoflex 30 + organohydrogel | 25 kPa (pneumatic) | Multi-stage modulus tuning (1.29 → 0.10 MPa) | Up to 34× self-weight |
| Xiang et al. (2022) | LMPA variable stiffness + electroadhesion | Ecoflex 00-30 + LMPA | 60 kPa | Stiffness change 0.143 → 0.016 N/mm | 10.74 N (envelope, rigid) |
| Han et al. (2025) | Mechanical metamaterial | Super-elastic (Yeoh model) | 100 kPa | Conformity error reduced to 0.13 mm (planar) | Improved shape matching |
| Tawk et al. (2022) | Metamaterial pad | TPU + metamaterial | 150 kPa | Peak pressure reduced 4.3–8.6× | Stable grasp in 2/3/4-finger configs |
| Gerez et al. (2020) | Telescopic hybrid | Vytaflex 40 + PLA | Not specified | Elongation ratio 5.3 | 59.9 N (rigid mode) |
| Zhu et al. (2023) | Parallel rigid + soft | Pneumatic rigid + fiber-reinforced | Not specified | Wide-range force | 27 kg dumbbell |
| Peng et al. (2024) | External rigid supports | Ecoflex 00-30/00-50 | 27.3 kPa | Lifting force +150% | 47 N (5 kg) |
| Chen et al. (2020) | Bellows soft-rigid | Not specified | 160 kPa | 51 N fingertip force | 21.3:1 payload-to-weight |
| Netzev et al. (2020) | Compliant cell stacks | TPC | Not specified | High success rate (120/120 trials) | Industrial part handling |
