# Supplementary material
Source: Research Square preprint supplement (doi:10.21203/rs.3.rs-10085889/v1)
Supplement: Supplementary file 3 [file 09b867cdce14b7c1a854138b.docx]

**Table 9.** Recommended benchmarking metrics and reporting standards for future studies on soft pneumatic grippers.

| **Metric** | **Current Reporting Rate** | **Recommended Minimum Standard** | **Priority** |
| --- | --- | --- | --- |
| Cycle life (actuation cycles) | ~15% | ≥1,000 cycles | High |
| Grasping success rate (standard objects) | 17% | ≥10 objects, ≥50 trials | High |
| Energy consumption per grasp | <10% | J/grasp or Wh/cycle | High |
| Standardized object set testing | ~25% | YCB or similar benchmark set | High |
| Statistical analysis (mean ± SD) | ~30% | Include variability | Medium |
