# Supplementary material
Source: Research Square preprint supplement (doi:10.21203/rs.3.rs-10085889/v1)
Supplement: Supplementary file 4 [file 160f45677eeebf0a90ec4bb6.docx]

**Table S14**. Object adaptability and application focus.

| **Application Domain** | **Studies (n)** | **Typical Object Size Range** | **Reported Success Rate** | **Key Performance Highlight** |
| --- | --- | --- | --- | --- |
| Delicate / Fragile (egg, fruit, tissue) | 12 | 1 mm – 100 mm | 95–100% | High compliance (PneuNet, Fin Ray) |
| Heavy / Industrial | 8 | Up to 27 kg | 100% (targeted) | Hybrid & fabric-reinforced |
| Agricultural Harvesting | 4 | Tomatoes, oysters | 80–100% | Vision + soft grip synergy |
| Surgical / Biomedical | 2 | 1.2 mm wires, tissue | High (gentle) | Low compressive force (0.27–0.79 N) |
| High-Speed / Dynamic | 1 | 4 m/s moving objects | Reliable capture | Energy-harvesting mechanism |
