# Supplementary material
Source: Research Square preprint supplement (doi:10.21203/rs.3.rs-10085889/v1)
Supplement: Supplementary file 5 [file 1f886f6fc0d180c60b5c212c.docx]

**Table 1.** Distribution of the 47 included studies across 12 classification categories.

| **Classification** | **Number of Studies** | **Percentage (%)** | **Average Max Pressure (kPa)** | **Average Max Payload (kg)** |
| --- | --- | --- | --- | --- |
| Pneumatically Actuated Elastomeric | 8 | 17.0 | 198.2 | 2.06 |
| Bioinspired and Biomimetic | 5 | 10.6 | 425.0 | 3.00 |
| Reconfigurable Morphology | 1 | 2.1 | 50.0 | — |
| Variable Stiffness | 6 | 12.8 | 128.0 | 1.49 |
| Mechanical Metamaterial-Integrated | 2 | 4.3 | 125.0 | — |
| Soft-Rigid Hybrid | 5 | 10.6 | 93.7 | 16.0 |
| Multistable | 2 | 4.3 | 135.0 | 0.105 |
| Origami-Inspired and Sensing-Enabled | 5 | 10.6 | 86.6 | 0.06 |
| Electroadhesion-Enhanced | 1 | 2.1 | — | 1.23 |
| Universal Cross-Scale | 1 | 2.1 | — | — |
| Emerging Alternative Actuation | 4 | 8.5 | 44.5 | 0.50 |
| Application-Tailored | 7 | 14.9 | 63.1 | 0.27 |
