# Supplementary material
Source: Research Square preprint supplement (doi:10.21203/rs.3.rs-10085889/v1)
Supplement: Supplementary file 6 [file 1f963d591f21797e1cb1d8bb.docx]

**Table S16.** Frequency and categories of reported limitations.

| **Limitation Category** | **Frequency (n studies)** | **Percentage (%)** | **Most Affected Classifications** |
| --- | --- | --- | --- |
| Lack of long-term durability / cycle testing | 21 | 44.7% | Pneumatic Elastomeric, Sensing-Enabled |
| Limited real-world / unstructured testing | 18 | 38.3% | Emerging, Bioinspired |
| Insufficient statistical analysis / variability | 15 | 31.9% | Variable Stiffness, Metamaterial |
| Low absolute force / payload | 12 | 25.5% | Sensing-Enabled, Emerging |
| Fabrication scalability challenges | 9 | 19.1% | Hybrid, Fabric-reinforced |
