# Supplementary material
Source: Research Square preprint supplement (doi:10.21203/rs.3.rs-10085889/v1)
Supplement: Supplementary file 7 [file 2271d0b7a2a888c3ad7199b3.docx]

**Table 4.** Summary of risk of bias assessment across 47 studies.

| **RoB Level** | **Number of Studies** | **Percentage (%)** | **Interpretation** |
| --- | --- | --- | --- |
| Low | 18 | 38.3% | High methodological quality |
| Low-Moderate | 12 | 25.5% | Minor limitations |
| Moderate | 15 | 31.9% | Acceptable with some gaps |
| High | 2 | 4.3% | Preliminary designs |
