# Supplementary material
Source: Research Square preprint supplement (doi:10.21203/rs.3.rs-10085889/v1)
Supplement: Supplementary file 8 [file 22785c2ec1124a9bd660c584.docx]

**Table S13**. Modeling approaches versus experimental validation.

| **Modeling Approach** | **Studies (n)** | **Strong FEA Validation (%)** | **Avg. Experimental Agreement** | **Key Strength** |
| --- | --- | --- | --- | --- |
| Hyperelastic FEA (Mooney-Rivlin / Yeoh / Ogden) | 22 | 82% | Good (≤10% difference) | High predictive accuracy |
| Analytical / Kinematic | 11 | 55% | Moderate | Fast design iteration |
| No / Limited Modeling | 14 | 21% | — | Proof-of-concept focus |
| Data-driven (Neural Networks) | 3 | 100% | Excellent | Inverse design capability |
