# Supplementary material
Source: Research Square preprint supplement (doi:10.21203/rs.3.rs-10085889/v1)
Supplement: Supplementary file 9 [file 3a0e1c6cf65dd590526fe34d.docx]

**Table 7.** Performance gains from key pneumatic-specific innovations.

| **Innovation Type** | **Studies (n)** | **Avg. Force/Payload Improvement** | **Avg. Stiffness Improvement** | **Avg. Other Gain** | **Representative Studies** |
| --- | --- | --- | --- | --- | --- |
| Rigid Supports / Hybrid | 5 | +150% to 400× | 5.3× elongation | 21.3:1 payload-to-weight | Peng, Gerez, Zhu, Chen |
| Particle Jamming / Variable Stiffness | 4 | 3× load capacity | >6× rotational | Modulus tuning (1.29→0.10 MPa) | Li, Zhao, Zhuo, Xiang |
| Metamaterial Integration | 2 | — | Peak pressure reduced 4.3–8.6× | Conformity error 1.80→0.13 mm | Han, Tawk |
| Electroadhesion Enhancement | 1 | +13.8% grasping mass | — | Versatile lightweight grasping | Huang |
| Energy Harvesting / Alternative | 2 | — | — | 27.86–31.82% efficiency; 4 m/s capture | Zhang (2022), Mirvakili |
