# Supplementary material
Source: Research Square preprint supplement (doi:10.21203/rs.3.rs-10085889/v1)
Supplement: Supplementary file 10 [file 3fe398f788f501aae406bcac.docx]

**Table 6.** Temporal evolution of soft actuator performance and architectural focus across three distinct time periods between 2016 and 2025

| **Period** | **Studies (n)** | **Avg. Max Pressure (kPa)** | **Avg. Max Force (N)** | **Avg. Max Payload (kg)** | **Key Trend** |
| --- | --- | --- | --- | --- | --- |
| 2016–2019 | 8 | 98 | 28.4 | 1.9 | Focus on basic compliance & bioinspiration |
| 2020–2022 | 12 | 132 | 41.7 | 3.4 | Rise of hybrid & variable stiffness designs |
| 2023–2025 | 27 | 148 | 52.6 | 5.8 | Integration of sensing, metamaterials & emerging actuation |
