# Supplementary material
Source: Research Square preprint supplement (doi:10.21203/rs.3.rs-10085889/v1)
Supplement: Supplementary file 11 [file 4135f3bff45c48223d6685f6.docx]

**Table S19.** Detailed inclusion and exclusion criteria.

| **Category** | **Criterion** | **Description** | **Rationale** |
| --- | --- | --- | --- |
| **Inclusion** | Peer-reviewed journal or conference articles | Full-length original research articles published in peer-reviewed venues | Ensures scientific quality and traceability |
| Focus on soft robotic grippers or soft pneumatic actuators for grasping | Studies developing, characterizing, or testing soft grippers (pneumatic, hybrid, bioinspired, variable stiffness, sensing-enabled, etc.) | Directly relevant to the review scope |
| Quantitative performance data reported | At least one of: pressure, bending angle/deflection, grasping force, payload, stiffness, success rate, or sensing accuracy | Enables quantitative synthesis and meta-analysis |
| Published between 2016 and 2025 | Studies from the last decade reflecting recent technological advancements | Balances recency with sufficient body of literature |
| English language | Full text available in English | Practical for comprehensive analysis |
| **Exclusion** | Purely theoretical, simulation-only, or review articles | No experimental validation or prototype testing | Focuses on empirical performance data |
| Rigid or traditional robotic grippers | No soft materials or compliant mechanisms | Outside the scope of soft robotics |
| Insufficient performance metrics | No quantitative data on actuation or grasping performance | Required for quantitative synthesis |
| Duplicate publications or overlapping datasets | Same study reported in multiple papers | Avoids double-counting |
| Non-gripping soft actuators (e.g., locomotion only) | Soft actuators not designed or tested for grasping tasks | Maintains relevance to gripping applications |
