# Supplementary material
Source: Research Square preprint supplement (doi:10.21203/rs.3.rs-10085889/v1)
Supplement: Supplementary file 12 [file 4386d2aad3ea08fac29dc18c.docx]

**Table S4.** Performance summary by dominant material type.

| **Material Type** | **Studies (n)** | **Avg. Max Pressure (kPa)** | **Avg. Max Force (N)** | **Avg. Max Payload (kg)** | **Key Strength** |
| --- | --- | --- | --- | --- | --- |
| TPU / TPU-coated | 9 | 210 | 58.5 | 3.5 | High printability & load-bearing |
| Silicone / Ecoflex / Dragon Skin | 15 | 112 | 28.4 | 1.8 | Excellent compliance & biocompatibility |
| Hybrid (soft-rigid / jamming) | 12 | 95 | 68.2 | 9.8 | Superior absolute performance |
| Fabric-reinforced | 2 | 85 | >150 | >7 | Extreme load-to-weight ratio |
| Emerging / Alternative | 4 | 44 | 13.3 | 0.5 | Low-energy / untethered operation |
