# Supplementary material
Source: Research Square preprint supplement (doi:10.21203/rs.3.rs-10085889/v1)
Supplement: Supplementary file 13 [file 52fb5aad36e89f3e2da4c9f0.docx]

**Table S2.** Complete classification and key performance metrics for all 47 included studies.

| **Classification** | **Author et al. (Year)** | **Material** | **Max Pressure (kPa)** | **Max Bending Angle (°)/Deflection (mm)** | **Max Grasping Force (N)/Payload** | **Key Additional Metric** |
| --- | --- | --- | --- | --- | --- | --- |
| Pneumatically Actuated Elastomeric Grippers with Discrete Chamber Architectures | Hiremath et al. (2025) | TPU (MEX 3D-printed) | 500 | 72 mm deflection | 13.26 g | — |
|  | Buonamici et al. (2025) | TPU (FFF PneuNet) | 300 | 68.7° | 17.16 N (normal) | 100% success on select produce |
|  | El Bana et al. (2020) | Dragon Skin 20 | Low (FEA-optimized) | 300 mm bending radius | 1 kg | — |
|  | Arumathanthri et al. (2018) | Natural rubber (4-chamber) | 160–230 | 25° | 215 g | — |
|  | Liu et al. (2025) | Dragon Skin 10 | Vision-controlled | 60.6° (measured) | — | 100% fabrication yield |
|  | Bhat et al. (2025) | LSR (multi-chamber) | 90–100 | Pressure-dependent increase | Gripping force ↑ with P | Human-finger mimicry |
| **Classification** | **Author et al. (Year)** | **Material** | **Max Pressure (kPa)** | **Max Bending Angle (°)/Deflection (mm)** | **Max Grasping Force (N)/Payload** | **Key Additional Metric** |
|  | Pedro et al. (2018) | Elastomer (closed-structure) | ~14 | — | >1 kg | — |
|  | Zhang et al. (2023) | TPU-coated nylon fabric | 50 (tip); 120 (burst) | Full bend (~600 ms) | >150 N pull-off | >7 kg; 400× dead-weight ratio |
| Bioinspired and Biomimetic Soft Grippers | Yang et al. (2020) | Ecoflex 00-10/00-30 + Dragon Skin 10 | 670 | 540° twining | — | 1 mm object detection |
|  | Antonelli et al. (2024) | TPU + R PRO20 silicone | 180 | 154.5 mm extension | 11.9 N push | 74.9 ms activation |
|  | Ali et al. (2019) | NinjaFlex | — | High deformation | 3 kg | — |
|  | Kitamura et al. (2023) | Elastic50A resin | — | — | 20.8 N peak contact | Cross-beam angle optimization |
|  | Müller et al. | TPU-95A | — | 14.8% strain | ~40 N pull-off | Heavy-duty validated |
| Reconfigurable Morphology Grippers | Hao et al. (2016) | Dragon Skin 30 + nylon tendon | 30–70 | 160 mm opening span | 13.5 N pull-off | Variable length optimization |
| **Classification** | **Author et al. (Year)** | **Material** | **Max Pressure (kPa)** | **Max Bending Angle (°)/Deflection (mm)** | **Max Grasping Force (N)/Payload** | **Key Additional Metric** |
| Variable Stiffness Soft Grippers | Mutlu et al. (2017) | NinjaFlex (bellows) | — | — | — | +30% stiffness |
|  | Zhao et al. (2023) | Silicone + Velcro | 90 | 140° | 0.71 → 1.313 kg | — |
|  | Al Abeach et al. (2017) | Silicone (antagonistic) | 400 | — | 200 N (contractor) | +163% stiffness |
|  | Li et al. (2017) | Silicone + particles | 50–80 | — | 1.673 kg | >6× rotational stiffness |
|  | Zhuo et al. (2020) | Ecoflex 30 + organohydrogel | 25 (pneumatic) | — | 34× self-weight | Modulus 1.29 → 0.10 MPa |
|  | Xiang et al. (2022) | Ecoflex 00-30 + LMPA | 60 | — | 10.74 N (envelope, rigid) | Stiffness 0.143 → 0.016 N/mm |
| Mechanical Metamaterial-Integrated Pneumatic Grippers | Han et al. (2025) | Super-elastic (Yeoh) | 100 | — | — | Conformity error 1.80 → 0.13 mm |
| **Classification** | **Author et al. (Year)** | **Material** | **Max Pressure (kPa)** | **Max Bending Angle (°)/Deflection (mm)** | **Max Grasping Force (N)/Payload** | **Key Additional Metric** |
|  | Tawk et al. (2022) | TPU + metamaterial pad | 150 | — | 1.94 N (tip) | Peak pressure reduced 4.3–8.6× |
| Soft-Rigid Hybrid Grippers | Gerez et al. (2020) | Vytaflex 40 + PLA | — | 5.3× elongation | 59.9 N (rigid mode) | >40 N pull-off resistance |
|  | Zhu et al. (2023) | Pneumatic rigid + fiber-reinforced | — | — | 27 kg | — |
|  | Peng et al. (2024) | Ecoflex 00-30/00-50 + rigid supports | 27.3 | — | 47 N | +150% lifting force; 5 kg |
|  | Chen et al. (2020) | Bellows soft-rigid | 160 | 112° opening | 51 N fingertip | 21.3:1 payload-to-weight |
|  | Netzev et al. | TPC (cell stacks) | — | — | — | 120/120 successful trials |
| Multistable Gripping Systems | Zhang et al. (2022) | Silicone E615 + CFRP bistable | 99–171 | Snap-through 0.47 s | 77–105 g | 0.0207 J/g energy |
|  | Nguyen et al. (2020) | Tape string + bi-stable springs | — | — | Pull force ↑ 186–711% | Pinch/wrap adaptation |
| **Classification** | **Author et al. (Year)** | **Material** | **Max Pressure (kPa)** | **Max Bending Angle (°)/Deflection (mm)** | **Max Grasping Force (N)/Payload** | **Key Additional Metric** |
| Origami-Inspired and Sensing-Enabled Intelligent Grippers | Wang et al. (2024) | Paper + Ecoflex 00-30 (origami) | ~70 | ~360° | ~60 g | 95% gesture accuracy |
|  | Wang et al. (2025) | TPU + FlexiRay (visual-tactile) | — | 15 mm contact depth (7.5 N) | 0.17 N accuracy | 0.96 mm position; 96.7% texture recognition |
|  | Sithiwichankit et al. (2023) | Ecoflex 00-30 + piezoresistive | — | — | — | 15% stiffness error |
|  | Goh et al. (2022) | Ecoflex 00-50 + TENG | 50–275 | 60° bend | — | 91.7% object classification |
|  | Zou et al. (2024) | Various (retrofit fluidic) | 26–28.5 | — | — | 0.02–0.04 kPa/mm resolution |
| Electroadhesion-Enhanced Pneumatic Grippers | Huang et al. (2025) | Dual-pneumatic + electroadhesive film | — | — | 1230 g | 13.8% improvement |
| **Classification** | **Author et al. (Year)** | **Material** | **Max Pressure (kPa)** | **Max Bending Angle (°)/Deflection (mm)** | **Max Grasping Force (N)/Payload** | **Key Additional Metric** |
| Universal Cross-Scale Grasping Systems | Zhou et al. (2025) | Silicone + granular jamming + suction | — | — | 6.14 N (synergistic) | 0.2 mm² – 62,000 mm² range |
| Emerging Alternative Actuation Paradigms | Mirvakili et al. | Ecoflex 00-50 + solar absorber | Solar-driven (~85) | — | 0.5 kg | 25× fluid mass |
|  | Kim et al. | Ecoflex 00-30 + origami pump | 33.56 | 107.95° | 0.0653 N blocking | No external compressor |
|  | Zhang et al. | Silicone + electromagnetic piston | Variable sinusoidal | — | — | Continuous pressure waveforms |
|  | Zhang et al. (2022) | Silicone + Kevlar | 0–30 (harvested) | — | 26.6 N detachment | 27.86–31.82% harvesting efficiency; 4 m/s capture |
| Application-Tailored Soft Grippers | Zhang et al. (2025) | Soft pneumatic (oysters) | 40 (optimal) | — | 2.46–6.01 N peak | 100% success |
| **Classification** | **Author et al. (Year)** | **Material** | **Max Pressure (kPa)** | **Max Bending Angle (°)/Deflection (mm)** | **Max Grasping Force (N)/Payload** | **Key Additional Metric** |
|  | Kultongkham et al. (2021) | Platinum-based silicone (tomatoes) | 95 | — | 1.62 N | Below bio-yield (2.57 N) |
|  | Wang et al. | Fluidic elastomer (lunch box) | 40–180 | 58–89° | — | Successful lift at 40–60 kPa |
|  | Krahn et al. (2017) | ABS + membrane | 7.47 (chamber) | — | 10.1 N grip strength | Suction + friction |
|  | Bryan et al. (2019) | Ecoflex 00-30/Mold Star 30 + suction | — | — | 270 g | Weighted cylinder |
|  | Low et al. (2016) | Silicone (rod-cast, surgical) | — | — | 0.79 N (double-arm) | 0.27–0.79 N compressive force |
|  | Netzev et al. | TPC cell stacks (industrial) | — | — | — | 120/120 successful grasps |
