# Supplementary material
Source: Research Square preprint supplement (doi:10.21203/rs.3.rs-10085889/v1)
Supplement: Supplementary file 14 [file 61c2d78f9d2a4eb966378b90.docx]

**Table S6.** Material vs fabrication method cross-analysis.

| **Material Type** | **Primary Fabrication** | **Studies (n)** | **Avg. Pressure (kPa)** | **Avg. Force (N)** | **Avg. Payload (kg)** | **Strength** |
| --- | --- | --- | --- | --- | --- | --- |
| TPU / TPU-coated | 3D Printing (MEX/FFF) | 9 | 210 | 58.5 | 3.5 | Best printability & geometry freedom |
| Silicone (Ecoflex/Dragon Skin) | Casting / Molding | 15 | 112 | 28.4 | 1.8 | Highest compliance |
| Hybrid (Rigid + Soft) | 3D Print + Assembly | 12 | 95 | 68.2 | 11.2 | Highest load capacity |
| Fabric-Reinforced | Heat-sealing + Wrapping | 2 | 85 | >150 | >7 | Extreme strength-to-weight |
| Emerging (LMPA, Solar, etc.) | Multi-step / Custom | 4 | 44 | 13.3 | 0.5 | Low-energy operation |
