# Supplementary material
Source: Research Square preprint supplement (doi:10.21203/rs.3.rs-10085889/v1)
Supplement: Supplementary file 15 [file 6966152d2b32fb9dfb68de81.docx]

**Table S3.** Performance comparison across actuation paradigm.

| **Actuation Paradigm** | **Studies (n)** | **Avg. Max Pressure (kPa)** | **Avg. Max Force (N)** | **Avg. Max Payload (kg)** | **Primary Advantage** | **Main Limitation** |
| --- | --- | --- | --- | --- | --- | --- |
| Pure Pneumatic Elastomeric | 8 | 198 | 83.6 | 2.06 | High pressure & fast response | Lower adaptability |
| Hybrid (Soft-Rigid / Jamming) | 12 | 95 | 68.2 | 11.2 | Highest absolute load capacity | Increased complexity |
| Variable Stiffness / Tunable | 6 | 128 | 105.4 | 1.49 | Excellent compliance tuning | Higher energy for stiffness |
| Emerging Alternative | 4 | 44 | 13.3 | 0.50 | Low-energy / untethered | Lower absolute force |
| Sensing-Integrated | 11 | 86 | 12.4 | 0.27 | Real-time intelligence | Reduced raw force |
