# Supplementary material
Source: Research Square preprint supplement (doi:10.21203/rs.3.rs-10085889/v1)
Supplement: Supplementary file 16 [file 6966fdf1b6989aa22cea7bd1.docx]

**Table S17.** Detailed sensing-enabled and electroadhesion studies.

| **Study** | **Category** | **Key Metric** | **Quantitative Result** |
| --- | --- | --- | --- |
| Wang et al. (2024) | Origami + EMG/ML | Gesture recognition accuracy | ~95% test accuracy; max 60 g lift |
| Wang et al. (2025) | FlexiRay visual-tactile | Force / position / temperature accuracy | 0.17 N force, 0.96 mm location, 1.17°C temperature |
| Sithiwichankit et al. (2023) | Pincer stiffness sensing | Stiffness estimation error | 15% average error |
| Goh et al. (2022) | TENG + AI | Object classification accuracy | 91.7% |
| Zou et al. (2024) | Retrofit fluidic sensing | Sensing resolution | 0.02–0.04 kPa/mm; millimeter-level accuracy |
| Huang et al. (2025) | Electroadhesion-enhanced dual-pneumatic | Max grasping mass | 1230 g (13.8% improvement) |
| Zhou et al. (2025) | Universal EG gripper | Synergistic mode force | 6.14 N average; cross-scale (0.2 mm² – 62,000 mm²) |
| Mirvakili et al. (2021) | Solar-thermal phase-change | Lift capacity | 0.5 kg (25× fluid mass) |
| Kim et al. (2020) | Tendon-driven origami pump | Blocking force | 0.0653 N |
| Zhang et al. (2023) | Electromagnetic variable-pressure | Pressure waveform control | Continuous sinusoidal profiles |
| Zhang et al. (2022) | Energy-harvesting finger-palm | Harvesting efficiency | 27.86–31.82%; captures 4 m/s objects |
