# Supplementary material
Source: Research Square preprint supplement (doi:10.21203/rs.3.rs-10085889/v1)
Supplement: Supplementary file 17 [file b0a7d00ec5ff7e7071351405.docx]

**Table 5.** Best-in-class performance across the 12 categories of soft pneumatic grippers.

| **Classification** | **Top Study** | **Max Pressure (kPa)** | **Max Force (N) / Payload (kg)** | **Key Record Metric** |
| --- | --- | --- | --- | --- |
| Pneumatically Actuated Elastomeric | Zhang et al. (2023) | 50–120 | >150 N / >7 kg | 400× dead-weight ratio |
| Bioinspired and Biomimetic | Antonelli et al. (2024) | 180 | 11.9 N | 154.5 mm extension |
| Reconfigurable Morphology | Hao et al. (2016) | 30–70 | 13.5 N | 160 mm opening span |
| Variable Stiffness | Al Abeach et al. (2017) | 400 | 200 N | +163% stiffness |
| Mechanical Metamaterial-Integrated | Tawk et al. (2022) | 150 | 1.94 N | 4.3–8.6× peak pressure reduction |
| Soft-Rigid Hybrid | Zhu et al. (2023) | — | 27 kg | Highest absolute payload |
| Multistable | Zhang et al. (2022) | 99–171 | 77–105 g | 0.0207 J/g energy consumption |
| Origami-Inspired and Sensing-Enabled | Wang et al. (2025) | — | 0.17 N accuracy | 96.7% texture recognition |
| Electroadhesion-Enhanced | Huang et al. (2025) | — | 1.23 kg | +13.8% grasping mass |
| Universal Cross-Scale | Zhou et al. (2025) | — | 6.14 N | 0.2 mm² – 62,000 mm² range |
| Emerging Alternative Actuation | Mirvakili et al. | Solar (~85) | 0.5 kg | 25× fluid mass |
| Application-Tailored | Zhang et al. (2023) fabric | 50–120 | >150 N | Industrial/high-load |
