# Supplementary material
Source: Research Square preprint supplement (doi:10.21203/rs.3.rs-10085889/v1)
Supplement: Supplementary file 18 [file b13c84de6bbfb747154c3ffd.docx]

**Table 2.** Quantitative descriptive synthesis of key performance metrics across 47 studies on soft pneumatic grippers.

| **Metric** | **Studies with Data (n)** | **Mean** | **Median** | **Range (Min–Max)** | **Notes** |
| --- | --- | --- | --- | --- | --- |
| Max Pressure (kPa) | 29 | 136.1 | 90.0 | 7.5–670 | Pneumatic-dominant designs |
| Max Payload (kg) | 15 | 3.29 | 1.00 | 0.013–27.0 | Hybrids dominate |
| Max Grasping Force (N) | 19 | 36.2 | 11.9 | 0.065–200 | All force types included |
| Stiffness Fold-Increase | 5 | 4.45 | 2.63 | 1.3–12.9 | Variable/jamming designs |
| Success Rate (%) | 8 | 98.3 | 100.0 | 91.7–100 | Sensing/application studies |
