# Supplementary material
Source: Research Square preprint supplement (doi:10.21203/rs.3.rs-10085889/v1)
Supplement: Supplementary file 19 [file b9c99cce292ccb0e480d94ae.docx]

**Table S15**. Detailed publication trends and performance evolution.

| **Period** | **Studies (n)** | **% of Total** | **Avg. Max Pressure (kPa)** | **Avg. Max Force (N)** | **Avg. Max Payload (kg)** | **Dominant Trend** |
| --- | --- | --- | --- | --- | --- | --- |
| 2016–2019 | 8 | 17.0% | 98 | 28.4 | 1.9 | Basic compliance & bioinspired designs |
| 2020–2022 | 12 | 25.5% | 132 | 41.7 | 3.4 | Rise of hybrids, jamming & metamaterials |
| 2023–2025 | 27 | 57.4% | 148 | 52.6 | 5.8 | Sensing integration, emerging actuation & application-specific optimization |
