# Supplementary material
Source: Research Square preprint supplement (doi:10.21203/rs.3.rs-10085889/v1)
Supplement: Supplementary file 20 [file c29fcd25a8e268806bde8eb5.docx]

**Table S7.** Relationship between actuation pressure and output performance.

| **Pressure Range (kPa)** | **Studies (n)** | **Avg. Max Force (N)** | **Avg. Max Payload (kg)** | **Correlation Insight** |
| --- | --- | --- | --- | --- |
| <50 | 8 | 12.8 | 0.85 | Best for delicate grasping |
| 50–150 | 12 | 45.3 | 3.2 | Optimal balance zone |
| >150 | 9 | 92.7 | 4.1 | Highest absolute performance (hybrids & fabric) |
