# Supplementary material
Source: Research Square preprint supplement (doi:10.21203/rs.3.rs-10085889/v1)
Supplement: Supplementary file 21 [file c347321e6da0932314c6c034.docx]

**Table 8.** Identified research gaps across the 12 categories.

| **Classification** | **Studies (n)** | **% Reporting Pressure** | **% Reporting Force/Payload** | **% Reporting Success Rate** | **Notable Gap** |
| --- | --- | --- | --- | --- | --- |
| Pneumatically Actuated Elastomeric | 8 | 100% | 75% | 25% | Limited cycle-life data |
| Soft-Rigid Hybrid | 5 | 40% | 80% | 20% | Few long-term durability tests |
| Variable Stiffness | 6 | 67% | 50% | 0% | Sparse stiffness quantification |
| Emerging Alternative Actuation | 4 | 75% | 50% | 0% | Limited real-world testing |
| Overall (All Studies) | 47 | 62% | 40% | 17% | Lack of standardized benchmarks |
