# Supplementary material
Source: Research Square preprint supplement (doi:10.21203/rs.3.rs-10085889/v1)
Supplement: Supplementary file 22 [file d1d3b0caaf38001805066612.docx]

**Table S1.** Summary of key numerical performance outcomes from 47 experimental studies on soft pneumatic grippers published between 2016 and 2025. The table presents actuation pressure, bending/deflection performance, grasping and pull-off forces, payload capacity, stiffness modulation, and other critical metrics across twelve design categories to enable systematic comparison of innovations and performance benchmarks.

| **Study (Year)** | **Category** | **Material / Fabrication** | **Actuation Pressure** | **Key Performance Metrics** | **Notable Numerical Outcome** | **Main Finding** |
| --- | --- | --- | --- | --- | --- | --- |
| **Hiremath et al. (2025)** | Discrete Chamber (TPU 3D-printed) | TPU (MEX 3D printing) | 1–5 bar | Max deflection: **72 mm** Bending: 17–72 mm | Held **1.29–13.26 g** | Excellent adaptability & compliance |
| **Buonamici et al. (2025)** | Anthropomorphic PneuNet | TPU (FFF 3D printing) | Up to 3 bar | Bending: **68.7°** at 3 bar Transversal force: **17.16 N** | 100% success on several fruits/vegetables | Strong potential for assistive/rehab use |
| **El Bana et al. (2020)** | Silicone PneuNet | Dragon Skin 20 | Low pressure | High bending radius at low pressure | Fast actuation | Good for fragile objects |
| **Arumathanthri et al. (2018)** | Multi-chamber | Natural rubber | Up to 230 kPa | Bending: **25°** at 230 kPa Max lift: **215 g** | Easier grasp on low-friction objects | Effective for delicate food handling |
| **Jiang et al. (2025)** | Vision-controlled | Dragon Skin 10 | — | Bending: **60.6°** (vs 90° target) Cost reduction: **>60%** | 100% fabrication yield | Practical framework for agricultural robotics |
| **Study (Year)** | **Category** | **Material / Fabrication** | **Actuation Pressure** | **Key Performance Metrics** | **Notable Numerical Outcome** | **Main Finding** |
| **Bhat et al. (2025)** | Human finger-inspired | LSR (cast) | — | Bending & force increased with pressure | Mimicked natural finger motion | Strong potential for prosthetics & rehab |
| **Pedro et al. (2018)** | Biomimetic (Sea lamprey) | Elastomer | 0.05–0.15 kgf/cm² | Load: **0.048 kg to >1 kg** Max force: **4.353 N** | Good force control | Simple, effective wide-range grasping |
| **Zhang et al. (2023)** | Fabric-reinforced contractile | TPU-coated nylon fabric | 50 kPa | Tip force: **45 N** Pull-off: **>150 N** Payload: **>7 kg** | **400×** dead-weight ratio | Excellent load-bearing & tunable workspace |
| **Yang et al. (2020)** | Twining plant-inspired | Ecoflex + Dragon Skin 10 | 0.67 MPa | Twining angle: **540°** Detection: **1 mm** objects | High repeatability in confined spaces | Accurate sensing + grasping in tight spaces |
| **Antonelli et al. (2024)** | Seahorse tail-inspired | TPU + R PRO20 silicone | 1.8 bar | Extension: **154.5 mm** Push force: **11.9 N** | Activation: **74.9 ms** | Effective leg module for multi-legged robots |
| **Ali et al. (2019)** | Fin Ray effect | NinjaFlex | — | Payload: **up to 3 kg** | High deformation & conformal wrapping | Effective for varied shapes |
| **Kitamura et al. (2023)** | Fin Ray (variable cross-beam) | Elastic50A resin | — | Peak force: **up to 20.8 N** | Optimal angles depend on object shape | Cross-beam angle selection is object-dependent |
| **Study (Year)** | **Category** | **Material / Fabrication** | **Actuation Pressure** | **Key Performance Metrics** | **Notable Numerical Outcome** | **Main Finding** |
| **Müller et al.** | Heavy-duty Fin Ray | TPU-95A | — | Pull-off force: **~40 N** | Validated via simulation | Low-cost validation method for heavy-duty use |
| **Hao et al. (2016)** | Reconfigurable (variable length) | Dragon Skin 30 | 30–70 kPa | Pull-off force: **13.5 N** (3× increase) Opening: **160 mm** | Optimal finger length exists per object size | Tunable length significantly improves performance |
| **Mutlu et al. (2017)** | Variable stiffness (bellows) | NinjaFlex (FFF) | Positive pressure | Stiffness increase: **30%** at 2 N | Higher load carrying in stiffened state | Effective variable compliance |
| **Zhao et al. (2023)** | Modular variable stiffness | Silicone + Velcro + particles | 90 kPa | Bending: **140°** Load capacity: **710 → 1313 g** | Good model-experiment agreement | Wide controllable stiffness range |
| **Al Abeach et al. (2017)** | Antagonistic variable stiffness | Silicone | 100–400 kPa | Stiffness ↑ **163%** Contractor force: **200 N** | PID accuracy: **±0.5 mm** | Effective stiffness modulation + positioning |
| **Li et al. (2017)** | Passive particle jamming | Silicone + particles | 20–80 kPa | Stiffness ↑ **>6×** Load: **369 → 1673 g** | Optimized with smaller particles & thinner walls | Simple & effective stiffness enhancement |
| **Zhuo et al. (2020)** | Pneumatic-thermal hybrid | Ecoflex + organohydrogels | 25 kPa | Modulus: **1.29 → 0.10 MPa** Cycle life: **>2000** | Self-healing: **88%** strength recovery | Stiffness-matching for fragile objects |
| **Study (Year)** | **Category** | **Material / Fabrication** | **Actuation Pressure** | **Key Performance Metrics** | **Notable Numerical Outcome** | **Main Finding** |
| **Xiang et al. (2022)** | Electroadhesive + LMPA variable stiffness | Ecoflex 00-30 + LMPA | 60 kPa | Stiffness: **0.143 → 0.016 N/mm** Force: **10.74 N (rigid)** | Successfully handled fragile/irregular objects | Combined electroadhesion + variable stiffness |
| **Han et al. (2025)** | Metamaterial-integrated | — | 100 kPa | Conformity error: **1.80 → 0.13 mm** (planar) | Neural network inverse design | Significantly improved surface conformity |
| **Tawk et al. (2022)** | Metamaterial pads | TPU (3D printed) | 150 kPa | Contact pressure ↓ **4.3–8.6×** Tip force: **1.94 N** | Stable grasping in 2/3/4-finger configs | Improved conformability & stability |
| **Gerez et al. (2020)** | Soft-rigid hybrid (telescopic) | Vytaflex 40 + PLA | — | Elongation: **5.3×** (20→100+ mm) Clench: **59.9 N** | Resisted >40 N pull-off | Versatile for real-world use |
| **Zhu et al. (2023)** | Parallel hybrid (rigid + soft) | — | — | Payload: **0.1 g – 27 kg** 94% span + 4 cm offset | High compliance + stability | Wide force range with compliance |
| **Peng et al. (2024)** | Soft + external rigid supports | Ecoflex + stainless steel | 27.3 kPa | Lifting force: **47 N** (↑150%) Payload: **up to 5 kg** | Outperformed previous SPAs at lower pressure | Enhanced lifting while maintaining adaptability |
| **Chen et al. (2020)** | High-voltage hybrid | — | 160 kPa | Fingertip force: **51 N** Payload ratio: **21.3:1** | Operated up to **492.3 kV AC** | Reliable under high-voltage conditions |
| **Study (Year)** | **Category** | **Material / Fabrication** | **Actuation Pressure** | **Key Performance Metrics** | **Notable Numerical Outcome** | **Main Finding** |
| **Netzev et al.** | Compliant cell stacks | TPC (FDM 3D printing) | — | **120/120** successful trials (turbine blade) | High success across industrial parts | Effective for industrial benchmarking |
| **Zhang et al. (2022)** | Bistable CFRP | Silicone E615 + CFRP | 0.099–0.171 MPa | Payload: **77–105 g** Energy: **0.0207 J/g** | Fast snap-through (**0.47 s**) | Energy-efficient bistable grasping |
| **Nguyen et al. (2020)** | Tristable | Bi-stable springs | — | Pull force ↑ **186–711%** | Adaptive pinch & wrap grasps | Improved reliability for small/flat objects |
| **Wang et al. (2024)** | Origami-based | Ecoflex 00-30 | ~6 psi | Bending: **nearly 360°** Lift: **up to 60 g** | Gesture recognition: **up to 95%** | Large range of motion + sensing |
| **Wang et al. (2025)** | FlexiRay (visual-tactile) | TPU + multi-layer sensing | — | Force accuracy: **0.17 N** Texture recognition: **96.7%** | High sensing coverage during deformation | High-resolution multimodal perception |
| **Sithiwichankit et al. (2023)** | Pincer with stiffness sensing | Ecoflex 00-30 + conductive PLA | — | Stiffness estimation error: **15%** | <5% signal variation after 1000 cycles | Direct stiffness sensing during grasping |
| **Goh et al. (2022)** | Triboelectric AI-assisted | Ecoflex + porous Eco-EGaIn | — | Classification accuracy: **91.7%** | 63% higher sensor output with porous layer | Self-powered real-time feedback |
| **Zou et al. (2024)** | Retrofit fluidic sensing | Multiple actuators | — | Resolution: **0.02–0.04 kPa/mm** | Millimeter-level accuracy | Sensing without embedded sensors |
| **Study (Year)** | **Category** | **Material / Fabrication** | **Actuation Pressure** | **Key Performance Metrics** | **Notable Numerical Outcome** | **Main Finding** |
| **Huang et al. (2025)** | Electroadhesion-enhanced dual | — | — | Max mass: **1230 g** (↑13.8%) | Handled fragile, irregular & large objects | Hybrid pneumatic + electroadhesion synergy |
| **Zhou et al. (2025)** | Everything-Grasping (EG) | Granular jamming + surface tension | — | Synergistic force: **6.14 N** Range: **0.2 mm² – 62,000 mm²** | Robust cross-scale & underwater performance | Universal single-architecture grasping |
| **Mirvakili et al. (2021)** | Solar-thermal phase-change | EcoFlex 00-50 | ~85 kPa | Lift: **up to 0.5 kg** (25× fluid mass) | Worked under sunlight | Compressor-free untethered actuation |
| **Kim et al. (2020)** | Tendon-driven origami pump | EcoFlex 00-30 | 33.56 kPa | Bending: **107.95°** | No external compressor needed | Compact, lightweight air source |
| **Zhang et al. (2023) (electromagnetic)** | Electromagnetic variable pressure | — | Tunable sinusoidal | Continuous adjustable pressure waveform | Good airtightness | Suitable for pneumatic soft robots |
| **Zhang et al. (2022) FPSED** | Energy-harvesting high-speed | Silicone + Kevlar | — | Harvesting efficiency: **27.86–31.82%** | Captured objects at **4 m/s** | Reliable high-speed capture |
| **Zhang et al. (2025)** | High-speed oyster handling | — | **40 kPa (optimum)** | Success rate: **100%** | No damage/misalignment | Stable high-speed aquatic handling |
| **Kultongkham et al. (2021)** | Tomato harvesting | Platinum silicone | — | Max force: **1.62 N** (< bio-yield 2.57 N) | Successful force-controlled harvesting | Safe for delicate produce |
| **Study (Year)** | **Category** | **Material / Fabrication** | **Actuation Pressure** | **Key Performance Metrics** | **Notable Numerical Outcome** | **Main Finding** |
| **Wang et al. (2016) (lunch box)** | Lunch box packing | Fluidic elastomer | 40–60 kPa | Successful lifting at 40 kPa (Designs 1 & 3) | Handled variable shapes & softness | Practical for automated packing |
| **Krahn et al. (2017)** | Friction + suction | ABS + membrane | Low chamber pressure | Grip strength: **10.1 N** at 7.47 kPa | Gentle yet secure grasping | Low power + effective for fragile objects |
| **Bryan et al. (2019)** | Humanoid + bioinspired suction | Ecoflex + Mold Star | — | Max payload: **270 g** | Successfully manipulated varied shapes | Versatile on industrial robot arm |
| **Low et al. (2016)** | Surgical tissue manipulation | Silicone (rod-cast) | — | Max compressive force: **0.79 N** | Significantly gentler than rigid forceps | Safe for delicate surgical use |
