# Supplementary material
Source: Research Square preprint supplement (doi:10.21203/rs.3.rs-10085889/v1)
Supplement: Supplementary file 23 [file db3317b8807b7e0179119e94.docx]

**Table S12.** Top 10 highest performance designs.

| **Rank** | **Author et al. (Year)** | **Classification** | **Max Payload (kg) / Force (N)** | **Max Pressure (kPa)** | **Key Advantage** |
| --- | --- | --- | --- | --- | --- |
| 1 | Zhu et al. (2023) | Soft-Rigid Hybrid | 27 kg | — | Highest absolute payload |
| 2 | Zhang et al. (2023) | Pneumatically Actuated Elastomeric | >7 kg / >150 N | 50–120 | 400× dead-weight ratio |
| 3 | Peng et al. (2024) | Soft-Rigid Hybrid | 5 kg / 47 N | 27.3 | +150% lifting force |
| 4 | Gerez et al. (2020) | Soft-Rigid Hybrid | — / 59.9 N | — | Highest rigid-mode force |
| 5 | Chen et al. (2020) | Soft-Rigid Hybrid | — / 51 N | 160 | 21.3:1 payload-to-weight |
| 6 | Al Abeach et al. (2017) | Variable Stiffness | — / 200 N | 400 | Highest contractor force |
| 7 | Huang et al. (2025) | Electroadhesion-Enhanced | 1.23 kg | — | 13.8% hybrid improvement |
| 8 | Li et al. (2017) | Variable Stiffness | 1.673 kg | 50–80 | >6× stiffness gain |
| 9 | Zhao et al. (2023) | Variable Stiffness | 1.313 kg | 90 | Modular jamming |
| 10 | Ali et al. (2019) | Bioinspired | 3 kg | — | Fin Ray adaptability |
