# Supplementary material
Source: Research Square preprint supplement (doi:10.21203/rs.3.rs-10085889/v1)
Supplement: Supplementary file 24 [file db949837dd0634d11d9ee7b5.docx]

**Table 3.** Quantitative descriptive synthesis of performance metrics by classification category

| **Classification** | **Pressure Mean (kPa) (n)** | **Force Mean (N) (n)** | **Payload Mean (kg) (n)** | **Key Trend** |
| --- | --- | --- | --- | --- |
| Pneumatically Actuated Elastomeric | 198.2 (6) | 83.6 (2) | 2.06 (4) | Highest pressures |
| Bioinspired and Biomimetic | 425.0 (2) | 15.9 (3) | 3.00 (1) | Adaptability focus |
| Reconfigurable Morphology | 50.0 (1) | 13.5 (1) | — | Size optimization |
| Variable Stiffness | 128.0 (5) | 105.4 (2) | 1.49 (2) | Largest relative gains |
| Mechanical Metamaterial-Integrated | 125.0 (2) | 1.94 (1) | — | Improved conformity |
| Soft-Rigid Hybrid | 93.7 (2) | 52.6 (3) | 16.0 (2) | Superior absolute performance |
| Multistable | 135.0 (1) | — | 0.105 (1) | Energy efficiency |
| Origami-Inspired and Sensing-Enabled | 86.6 (3) | — | 0.06 (1) | Sensing priority |
| Electroadhesion-Enhanced | — | — | 1.23 (1) | Hybrid-mode gain |
| Universal Cross-Scale | — | 6.14 (1) | — | Broadest range |
| Emerging Alternative Actuation | 44.5 (3) | 13.3 (2) | 0.50 (1) | Low-energy innovations |
| Application-Tailored | 63.1 (4) | 4.63 (3) | 0.27 (1) | Task-specific optimization |
