# Supplementary material
Source: Research Square preprint supplement (doi:10.21203/rs.3.rs-10085889/v1)
Supplement: Supplementary file 25 [file e37ab05672b1ece889916212.docx]

**Table S10.** Detailed data on bioinspired and biomimetic grippers.

| **Study** | **Inspiration** | **Material** | **Max Pressure** | **Key Performance Metric** | **Outcome** |
| --- | --- | --- | --- | --- | --- |
| Yang et al. (2020) | Twining plant | Ecoflex 00-10/00-30 + Dragon Skin 10 | 0.67 MPa | 540° twining angle | High repeatability; detects 1 mm objects |
| Antonelli et al. (2024) | Seahorse tail | TPU reinforcement + R PRO20 silicone | 1.8 bar | 154.5 mm tip extension; 11.9 N pushing force | Fast response (74.9 ms activation) |
| Ali et al. (2019) | Fin Ray effect | NinjaFlex | Not specified | 3 kg payload | High deformation capability |
| Kitamura et al. (2023) | Fin Ray (variable cross-beam) | Elastic50A resin | Not specified | Peak contact force 20.8 N | Optimum cross-beam angle depends on object shape |
| Müller et al. (2020) | Fin Ray (heavy-duty) | TPU-95A | Not specified | ~40 N pull-off force | Validated for heavy-duty applications |
