# Supplementary material
Source: Research Square preprint supplement (doi:10.21203/rs.3.rs-10085889/v1)
Supplement: Supplementary file 26 [file e54e6053351f7b89c3b1ea54.docx]

**Table S11.** Consolidated key performance benchmarks.

| **Benchmark Parameter** | **Current Best Reported** | **Achieved By** | **Recommended Target for Next-Gen Studies** |
| --- | --- | --- | --- |
| Maximum Payload | 27 kg | Zhu et al. (2023) | ≥30 kg with soft compliance |
| Force-to-Weight Ratio | 400× dead weight | Zhang et al. (2023) fabric | ≥500× |
| Grasping Success Rate (irregular objects) | 100% | Multiple (Huang, Zhou, etc.) | ≥95% on unstructured YCB objects |
| Sensing Accuracy | 0.17 N force / 0.96 mm position | Wang et al. (2025) FlexiRay | Sub-0.1 N / sub-mm |
| Energy per Grasp | 0.0207 J/g | Zhang et al. (2022) bistable | ≤0.01 J/g (energy-harvesting priority) |
| Cycle Life | >2000 (healed) | Zhuo et al. (2020) | ≥10,000 cycles |
