# Supplementary material
Source: Research Square preprint supplement (doi:10.21203/rs.3.rs-10085889/v1)
Supplement: Supplementary file 27 [file eec0e043afc08c75d35baa30.docx]

**Table S5**. Performance by fabrication method.

| **Fabrication Method** | **Studies (n)** | **Avg. Max Pressure (kPa)** | **Avg. Max Force (N)** | **Avg. Max Payload (kg)** | **Key Strength** |
| --- | --- | --- | --- | --- | --- |
| 3D-Printed (TPU/NinjaFlex/PLA) | 14 | 185 | 42.1 | 3.8 | Rapid prototyping & complex geometry |
| Silicone Casting (Ecoflex/Dragon Skin) | 18 | 98 | 29.3 | 1.9 | Superior compliance & biocompatibility |
| Fabric-Reinforced | 2 | 85 | >150 | >7 | Extreme load-to-weight ratio |
| Hybrid (rigid inserts/jamming) | 9 | 92 | 71.4 | 11.2 | Highest absolute performance |
| Emerging (origami/pump/solar) | 4 | 44 | 13.3 | 0.5 | Low-energy / untethered operation |
