# Supplementary material
Source: Research Square preprint supplement (doi:10.21203/rs.3.rs-10085889/v1)
Supplement: Supplementary file 28 [file fb040f11613d7f0d2647def2.docx]

**Table S18.** Sensing-enabled versus non-sensing grippers comparison data.

| **Category** | **Studies (n)** | **Avg. Max Force (N) / Payload (kg)** | **Key Sensing Metric** | **Advantage** |
| --- | --- | --- | --- | --- |
| Sensing-Enabled | 11 | 12.4 N / 0.27 kg | 91.7–96.7% accuracy / 15% error | Real-time feedback & adaptability |
| Non-Sensing (Pure Actuation) | 36 | 48.6 N / 4.8 kg | — | Higher raw force & payload |
